# Supplementary material for: Proteomic and immunocytochemical analyses of squamous components in two- and three-dimensional-cultured pancreatic ductal adenocarcinoma cell lines
Source: Oncol Lett. 2026 Mar 19;31(5):185. doi: 10.3892/ol.2026.15540 (PMC13034107; doi:10.3892/ol.2026.15540)
Supplement: Supporting Data [file Supplementary_Data2.xlsx]

## Sheet: Table SI
Table SI. Summary of ductal and squamous cell markers identified by proteomic analysis.
A, CK7
Sample no.	Cell line	Formation	Gene symbol	Accession no.	Description	Coverage, %	No. of peptides	No. of unique peptides	No. of PSMs
1	PK-8	Adherent	KRT5	P13647	Keratin, type II cytoskeletal 5	54	39	21	452
2	PK-45P	Adherent	KRT5	P13647	Keratin, type II cytoskeletal 5	34	24	10	198
3	PK-59	Adherent	KRT5	P13647	Keratin, type II cytoskeletal 5	59	51	30	953
4	PK-1	Adherent	KRT5	P13647	Keratin, type II cytoskeletal 5	62	47	28	1150
5	T3M-4	Adherent	KRT5	P13647	Keratin, type II cytoskeletal 5	63	51	30	1861
6	PANC-1	Adherent	KRT5	P13647	Keratin, type II cytoskeletal 5	33	20	8	214
7	KP4	Adherent	KRT5	P13647	Keratin, type II cytoskeletal 5	29	19	7	112
8	MIA PaCa-2	Adherent	KRT5	P13647	Keratin, type II cytoskeletal 5	32	22	9	221
9	PK-8	Sphere	KRT5	P13647	Keratin, type II cytoskeletal 5	46	31	15	383
10	PK-45P	Sphere	KRT5	P13647	Keratin, type II cytoskeletal 5	32	24	8	253
11	PK-59	Sphere	KRT5	P13647	Keratin, type II cytoskeletal 5	61	44	24	728
12	PK-1	Sphere	KRT5	P13647	Keratin, type II cytoskeletal 5	63	53	33	1560
13	T3M-4	Sphere	KRT5	P13647	Keratin, type II cytoskeletal 5	65	57	34	2233
14	PANC-1	Sphere	KRT5	P13647	Keratin, type II cytoskeletal 5	32	21	9	212
15	KP4	Sphere	KRT5	P13647	Keratin, type II cytoskeletal 5	18	15	4	92
16	MIA PaCa-2	Sphere	KRT5	P13647	Keratin, type II cytoskeletal 5	39	26	13	184
B, CK5
Sample no.	Cell line	Formation	Gene symbol	Accession no.	Description	Coverage, %	No. of peptides	No. of unique peptides	No. of PSMs
1	PK-8	Adherent	KRT6A	P02538	Keratin, type II cytoskeletal 6A	62	46	3	746
2	PK-45P	Adherent	KRT6A	P02538	Keratin, type II cytoskeletal 6A	53	33	3	426
3	PK-59	Adherent	KRT6A	P02538	Keratin, type II cytoskeletal 6A	63	57	4	1448
4	PK-1	Adherent	KRT6A	P02538	Keratin, type II cytoskeletal 6A	57	38	3	814
5	T3M-4	Adherent	KRT6A	P02538	Keratin, type II cytoskeletal 6A	63	56	3	2690
6	PANC-1	Adherent	KRT6A	P02538	Keratin, type II cytoskeletal 6A	39	22	3	298
7	KP4	Adherent	KRT6A	P02538	Keratin, type II cytoskeletal 6A	Not identified	Not identified	Not identified	Not identified
8	MIA PaCa-2	Adherent	KRT6A	P02538	Keratin, type II cytoskeletal 6A	28	20	2	286
9	PK-8	Sphere	KRT6A	P02538	Keratin, type II cytoskeletal 6A	59	39	3	718
10	PK-45P	Sphere	KRT6A	P02538	Keratin, type II cytoskeletal 6A	62	46	6	575
11	PK-59	Sphere	KRT6A	P02538	Keratin, type II cytoskeletal 6A	63	52	3	1263
12	PK-1	Sphere	KRT6A	P02538	Keratin, type II cytoskeletal 6A	59	40	3	824
13	T3M-4	Sphere	KRT6A	P02538	Keratin, type II cytoskeletal 6A	66	61	3	5166
14	PANC-1	Sphere	KRT6A	P02538	Keratin, type II cytoskeletal 6A	42	24	2	379
15	KP4	Sphere	KRT6A	P02538	Keratin, type II cytoskeletal 6A	29	18	5	136
16	MIA PaCa-2	Sphere	KRT6A	P02538	Keratin, type II cytoskeletal 6A	Not identified	Not identified	Not identified	Not identified
C, CK6A
Sample no.	Cell line	Formation	Gene symbol	Accession no.	Description	Coverage, %	No. of peptides	No. of unique peptides	No. of PSMs
1	PK-8	Adherent	KRT6B	P04259	Keratin, type II cytoskeletal 6B	62	45	4	702
2	PK-45P	Adherent	KRT6B	P04259	Keratin, type II cytoskeletal 6B	47	30	1	397
3	PK-59	Adherent	KRT6B	P04259	Keratin, type II cytoskeletal 6B	62	53	3	1199
4	PK-1	Adherent	KRT6B	P04259	Keratin, type II cytoskeletal 6B	53	35	2	748
5	T3M-4	Adherent	KRT6B	P04259	Keratin, type II cytoskeletal 6B	63	53	2	2129
6	PANC-1	Adherent	KRT6B	P04259	Keratin, type II cytoskeletal 6B	34	20	1	297
7	KP4	Adherent	KRT6B	P04259	Keratin, type II cytoskeletal 6B	Not identified	Not identified	Not identified	Not identified
8	MIA PaCa-2	Adherent	KRT6B	P04259	Keratin, type II cytoskeletal 6B	27	19	1	292
9	PK-8	Sphere	KRT6B	P04259	Keratin, type II cytoskeletal 6B	59	39	4	678
10	PK-45P	Sphere	KRT6B	P04259	Keratin, type II cytoskeletal 6B	61	44	4	559
11	PK-59	Sphere	KRT6B	P04259	Keratin, type II cytoskeletal 6B	62	49	3	1061
12	PK-1	Sphere	KRT6B	P04259	Keratin, type II cytoskeletal 6B	56	38	3	743
13	T3M-4	Sphere	KRT6B	P04259	Keratin, type II cytoskeletal 6B	65	57	2	4160
14	PANC-1	Sphere	KRT6B	P04259	Keratin, type II cytoskeletal 6B	37	22	1	372
15	KP4	Sphere	KRT6B	P04259	Keratin, type II cytoskeletal 6B	Not identified	Not identified	Not identified	Not identified
16	MIA PaCa-2	Sphere	KRT6B	P04259	Keratin, type II cytoskeletal 6B	Not identified	Not identified	Not identified	Not identified
D, CK6B
Sample no.	Cell line	Formation	Gene symbol	Accession no.	Description	Coverage, %	No. of peptides	No. of unique peptides	No. of PSMs
1	PK-8	Adherent	KRT6C	P48668	Keratin, type II cytoskeletal 6C	Not identified	Not identified	Not identified	Not identified
2	PK-45P	Adherent	KRT6C	P48668	Keratin, type II cytoskeletal 6C	Not identified	Not identified	Not identified	Not identified
3	PK-59	Adherent	KRT6C	P48668	Keratin, type II cytoskeletal 6C	Not identified	Not identified	Not identified	Not identified
4	PK-1	Adherent	KRT6C	P48668	Keratin, type II cytoskeletal 6C	Not identified	Not identified	Not identified	Not identified
5	T3M-4	Adherent	KRT6C	P48668	Keratin, type II cytoskeletal 6C	62	53	2	2410
6	PANC-1	Adherent	KRT6C	P48668	Keratin, type II cytoskeletal 6C	Not identified	Not identified	Not identified	Not identified
7	KP4	Adherent	KRT6C	P48668	Keratin, type II cytoskeletal 6C	33	20	6	144
8	MIA PaCa-2	Adherent	KRT6C	P48668	Keratin, type II cytoskeletal 6C	Not identified	Not identified	Not identified	Not identified
9	PK-8	Sphere	KRT6C	P48668	Keratin, type II cytoskeletal 6C	Not identified	Not identified	Not identified	Not identified
10	PK-45P	Sphere	KRT6C	P48668	Keratin, type II cytoskeletal 6C	Not identified	Not identified	Not identified	Not identified
11	PK-59	Sphere	KRT6C	P48668	Keratin, type II cytoskeletal 6C	Not identified	Not identified	Not identified	Not identified
12	PK-1	Sphere	KRT6C	P48668	Keratin, type II cytoskeletal 6C	Not identified	Not identified	Not identified	Not identified
13	T3M-4	Sphere	KRT6C	P48668	Keratin, type II cytoskeletal 6C	64	58	2	4730
14	PANC-1	Sphere	KRT6C	P48668	Keratin, type II cytoskeletal 6C	Not identified	Not identified	Not identified	Not identified
15	KP4	Sphere	KRT6C	P48668	Keratin, type II cytoskeletal 6C	Not identified	Not identified	Not identified	Not identified
16	MIA PaCa-2	Sphere	KRT6C	P48668	Keratin, type II cytoskeletal 6C	36	23	8	220
E, CK6C
Sample no.	Cell line	Formation	Gene symbol	Accession no.	Description	Coverage, %	No. of peptides	No. of unique peptides	No. of PSMs
1	PK-8	Adherent	KRT7	P08729	Keratin, type II cytoskeletal 7	68	43	33	1734
2	PK-45P	Adherent	KRT7	P08729	Keratin, type II cytoskeletal 7	65	36	28	1025
3	PK-59	Adherent	KRT7	P08729	Keratin, type II cytoskeletal 7	71	47	36	1305
4	PK-1	Adherent	KRT7	P08729	Keratin, type II cytoskeletal 7	69	42	33	2136
5	T3M-4	Adherent	KRT7	P08729	Keratin, type II cytoskeletal 7	67	38	29	1063
6	PANC-1	Adherent	KRT7	P08729	Keratin, type II cytoskeletal 7	18	10	4	270
7	KP4	Adherent	KRT7	P08729	Keratin, type II cytoskeletal 7	Not identified	Not identified	Not identified	Not identified
8	MIA PaCa-2	Adherent	KRT7	P08729	Keratin, type II cytoskeletal 7	Not identified	Not identified	Not identified	Not identified
9	PK-8	Sphere	KRT7	P08729	Keratin, type II cytoskeletal 7	69	41	32	1927
10	PK-45P	Sphere	KRT7	P08729	Keratin, type II cytoskeletal 7	72	49	41	1110
11	PK-59	Sphere	KRT7	P08729	Keratin, type II cytoskeletal 7	72	47	37	1397
12	PK-1	Sphere	KRT7	P08729	Keratin, type II cytoskeletal 7	69	41	32	1597
13	T3M-4	Sphere	KRT7	P08729	Keratin, type II cytoskeletal 7	72	49	38	2024
14	PANC-1	Sphere	KRT7	P08729	Keratin, type II cytoskeletal 7	26	14	6	345
15	KP4	Sphere	KRT7	P08729	Keratin, type II cytoskeletal 7	13	8	2	163
16	MIA PaCa-2	Sphere	KRT7	P08729	Keratin, type II cytoskeletal 7	10	7	1	322
F, p63
Sample no.	Cell line	Formation	Gene symbol	Accession no.	Description	Coverage, %	No. of peptides	No. of unique peptides	No. of PSMs
1	PK-8	Adherent	TP63	Q9H3D4	Tumor protein 63	30	19	19	112
2	PK-45P	Adherent	TP63	Q9H3D4	Tumor protein 63	19	10	10	20
3	PK-59	Adherent	TP63	Q9H3D4	Tumor protein 63	Not identified	Not identified	Not identified	Not identified
4	PK-1	Adherent	TP63	Q9H3D4	Tumor protein 63	26	14	14	75
5	T3M-4	Adherent	TP63	Q9H3D4	Tumor protein 63	30	18	16	161
6	PANC-1	Adherent	TP63	Q9H3D4	Tumor protein 63	Not identified	Not identified	Not identified	Not identified
7	KP4	Adherent	TP63	Q9H3D4	Tumor protein 63	Not identified	Not identified	Not identified	Not identified
8	MIA PaCa-2	Adherent	TP63	Q9H3D4	Tumor protein 63	6	3	3	9
9	PK-8	Sphere	TP63	Q9H3D4	Tumor protein 63	18	9	9	43
10	PK-45P	Sphere	TP63	Q9H3D4	Tumor protein 63	16	8	8	25
11	PK-59	Sphere	TP63	Q9H3D4	Tumor protein 63	Not identified	Not identified	Not identified	Not identified
12	PK-1	Sphere	TP63	Q9H3D4	Tumor protein 63	30	18	18	136
13	T3M-4	Sphere	TP63	Q9H3D4	Tumor protein 63	7	3	3	6
14	PANC-1	Sphere	TP63	Q9H3D4	Tumor protein 63	Not identified	Not identified	Not identified	Not identified
15	KP4	Sphere	TP63	Q9H3D4	Tumor protein 63	Not identified	Not identified	Not identified	Not identified
16	MIA PaCa-2	Sphere	TP63	Q9H3D4	Tumor protein 63	Not identified	Not identified	Not identified	Not identified
CK, cytokeratin PSM, peptide spectrum match
